# Supplementary material for: Neurologic Music Therapy in Geriatric Rehabilitation: A Systematic Review
Source: MDPI journal article supplement (doi:10.3390/healthcare10112187), 2022-10-31
Supplement: s1 [file s1]

| Unique ID                                          | Capato et.al. 2020                                                                                                                                                                  | Study ID   |                                                              | Assessor                                                                                                                   |                    |
|----------------------------------------------------|-------------------------------------------------------------------------------------------------------------------------------------------------------------------------------------|------------|--------------------------------------------------------------|----------------------------------------------------------------------------------------------------------------------------|--------------------|
| Ref or Label                                       |                                                                                                                                                                                     | Aim        | assignment to intervention (the 'intention-to-treat' effect) |                                                                                                                            |                    |
| Experimental                                       |                                                                                                                                                                                     | Comparator |                                                              | Source                                                                                                                     | Journal article(s) |
| Outcome                                            |                                                                                                                                                                                     | Results    |                                                              | Weight                                                                                                                     | 1                  |
| Domain                                             | Signalling question                                                                                                                                                                 |            | Response                                                     |                                                                                                                            | Comments           |
| Bias arising from the randomization process        | 1.1 Was the allocation sequence random?                                                                                                                                             |            | Y                                                            | Use a computer random number generator. Use of opaque sealed envelopes.                                                    |                    |
|                                                    | 1.2 Was the allocation sequence concealed until participants were enrolled and assigned to interventions?                                                                           |            | Y                                                            |                                                                                                                            |                    |
|                                                    | 1.3 Did baseline differences between intervention groups suggest a problem with the randomization process?                                                                          |            | PN                                                           |                                                                                                                            |                    |
|                                                    | Risk of bias judgement                                                                                                                                                              |            | Low                                                          |                                                                                                                            |                    |
| Bias due to deviations from intended interventions | 2.1.Were participants aware of their assigned intervention during the trial?                                                                                                        |            | N                                                            | Evaluators blinded to group designation.                                                                                   |                    |
|                                                    | 2.2.Were carers and people delivering the interventions aware of participants' assigned intervention during the trial?                                                              |            | PN                                                           |                                                                                                                            |                    |
|                                                    | 2.3. If Y/PY/NI to 2.1 or 2.2: Were there deviations from the intended intervention that arose because of the experimental context?                                                 |            | NA                                                           |                                                                                                                            |                    |
|                                                    | 2.4 If Y/PY to 2.3: Were these deviations likely to have affected the outcome?                                                                                                      |            | NA                                                           |                                                                                                                            |                    |
|                                                    | 2.5. If Y/PY/NI to 2.4: Were these deviations from intended intervention balanced between groups?                                                                                   |            | NA                                                           |                                                                                                                            |                    |
|                                                    | 2.6 Was an appropriate analysis used to estimate the effect of assignment to intervention?                                                                                          |            | Y                                                            |                                                                                                                            |                    |
|                                                    | 2.7 If N/PN/NI to 2.6: Was there potential for a substantial impact (on the result) of the failure to analyse participants in the group to which they were randomized?              |            | NA                                                           |                                                                                                                            |                    |
|                                                    | Risk of bias judgement                                                                                                                                                              |            | Low                                                          |                                                                                                                            |                    |
| Bias due to missing outcome data                   | 3.1 Were data for this outcome available for all, or nearly all, participants randomized?                                                                                           |            | N                                                            | Use of opaque sealed envelopes<br>Evaluators blinded to group designation<br>7 participants out of 25 dropped out, reasons |                    |
|                                                    | 3.2 If N/PN/NI to 3.1: Is there evidence that result was not biased by missing outcome data?                                                                                        |            | PN                                                           |                                                                                                                            |                    |
|                                                    | 3.3 If N/PN to 3.2: Could missingness in the outcome depend on its true value?                                                                                                      |            | PN                                                           |                                                                                                                            |                    |
|                                                    | 3.4 If Y/PY/NI to 3.3: Is it likely that missingness in the outcome depended on its true value?                                                                                     |            | NA                                                           |                                                                                                                            |                    |
|                                                    | Risk of bias judgement                                                                                                                                                              |            | Some concerns                                                |                                                                                                                            |                    |
| Bias in measurement of the outcome                 | 4.1 Was the method of measuring the outcome inappropriate?                                                                                                                          |            | N                                                            |                                                                                                                            |                    |
|                                                    | 4.2 Could measurement or ascertainment of the outcome have differed between intervention groups?                                                                                    |            | PN                                                           |                                                                                                                            |                    |
|                                                    | 4.3 Were outcome assessors aware of the intervention received by study participants?                                                                                                |            | PN                                                           |                                                                                                                            |                    |
|                                                    | 4.4 If Y/PY/NI to 4.3: Could assessment of the outcome have been influenced by knowledge of intervention received?                                                                  |            | NA                                                           |                                                                                                                            |                    |
|                                                    | 4.5 If Y/PY/NI to 4.4: Is it likely that assessment of the outcome was influenced by knowledge of intervention received?                                                            |            | NA                                                           |                                                                                                                            |                    |
|                                                    | Risk of bias judgement                                                                                                                                                              |            | Low                                                          |                                                                                                                            |                    |
| Bias in selection of the reported result           | 5.1 Were the data that produced this result analysed in accordance with a pre-specified analysis plan that was finalized before unblinded outcome data were available for analysis? |            | PY                                                           | Evaluators blinded to group designation<br>All pre-specified outcomes reported.                                            |                    |
|                                                    | 5.2 ... multiple eligible outcome measurements (e.g. scales, definitions, time points) within the outcome domain?                                                                   |            | PN                                                           |                                                                                                                            |                    |
|                                                    | 5.3 ... multiple eligible analyses of the data?                                                                                                                                     |            | PN                                                           |                                                                                                                            |                    |
|                                                    | Risk of bias judgement                                                                                                                                                              |            | Low                                                          |                                                                                                                            |                    |
| Overall bias                                       | Risk of bias judgement                                                                                                                                                              |            | Some concerns                                                |                                                                                                                            |                    |

| Unique ID                                          | Calabrò et. al. 2019                                                                                                                                                   | Study ID   |                                                              | Assessor                                                                                                                                                    |                    |
|----------------------------------------------------|------------------------------------------------------------------------------------------------------------------------------------------------------------------------|------------|--------------------------------------------------------------|-------------------------------------------------------------------------------------------------------------------------------------------------------------|--------------------|
| Ref or Label                                       |                                                                                                                                                                        | Aim        | assignment to intervention (the 'intention-to-treat' effect) |                                                                                                                                                             |                    |
| Experimental                                       |                                                                                                                                                                        | Comparator |                                                              | Source                                                                                                                                                      | Journal article(s) |
| Outcome                                            |                                                                                                                                                                        | Results    |                                                              | Weight                                                                                                                                                      | 1                  |
| Domain                                             | Signalling question                                                                                                                                                    |            | Response                                                     |                                                                                                                                                             | Comments           |
| Bias arising from the randomization process        | 1.1 Was the allocation sequence random?                                                                                                                                |            | PY                                                           | Random allocation to groups in a 1:1 ratio<br>Use of opaque sealed envelopes                                                                                |                    |
|                                                    | 1.2 Was the allocation sequence concealed until participants were enrolled and assigned to interventions?                                                              |            | Y                                                            |                                                                                                                                                             |                    |
|                                                    | 1.3 Did baseline differences between intervention groups suggest a problem with the randomization process?                                                             |            | PN                                                           |                                                                                                                                                             |                    |
|                                                    | Risk of bias judgement                                                                                                                                                 |            | Low                                                          |                                                                                                                                                             |                    |
| Bias due to deviations from intended interventions | 2.1.Were participants aware of their assigned intervention during the trial?                                                                                           |            | PN                                                           | Random allocation to groups in a 1:1 ratio, insufficient details<br>Use of opaque sealed envelopes (prepared in advance and marked inside with signs + and) |                    |
|                                                    | 2.2.Were carers and people delivering the interventions aware of participants' assigned intervention during the trial?                                                 |            | N                                                            |                                                                                                                                                             |                    |
|                                                    | 2.3. If Y/PY/NI to 2.1 or 2.2: Were there deviations from the intended intervention that arose because of the experimental context?                                    |            | NA                                                           |                                                                                                                                                             |                    |
|                                                    | 2.4 If Y/PY to 2.3: Were these deviations likely to have affected the outcome?                                                                                         |            | NA                                                           |                                                                                                                                                             |                    |
|                                                    | 2.5. If Y/PY/NI to 2.4: Were these deviations from intended intervention balanced between groups?                                                                      |            | NA                                                           |                                                                                                                                                             |                    |
|                                                    | 2.6 Was an appropriate analysis used to estimate the effect of assignment to intervention?                                                                             |            | PY                                                           |                                                                                                                                                             |                    |
|                                                    | 2.7 If N/PN/NI to 2.6: Was there potential for a substantial impact (on the result) of the failure to analyse participants in the group to which they were randomized? |            | NA                                                           |                                                                                                                                                             |                    |
|                                                    | Risk of bias judgement                                                                                                                                                 |            | Low                                                          |                                                                                                                                                             |                    |

|                                          |                                                                                                                                                                                     |            |                                     |
|------------------------------------------|-------------------------------------------------------------------------------------------------------------------------------------------------------------------------------------|------------|-------------------------------------|
| Bias due to missing outcome data         | 3.1 Were data for this outcome available for all, or nearly all, participants randomized?                                                                                           | Y          | No missing outcome data.            |
|                                          | 3.2 If N/PN/Ni to 3.1: Is there evidence that result was not biased by missing outcome data?                                                                                        | NA         |                                     |
|                                          | 3.3 If N/PN to 3.2: Could missingness in the outcome depend on its true value?                                                                                                      | NA         |                                     |
|                                          | 3.4 If Y/PY/Ni to 3.3: Is it likely that missingness in the outcome depended on its true value?                                                                                     | NA         |                                     |
|                                          | <b>Risk of bias judgement</b>                                                                                                                                                       | <b>Low</b> |                                     |
| Bias in measurement of the outcome       | 4.1 Was the method of measuring the outcome inappropriate?                                                                                                                          | N          |                                     |
|                                          | 4.2 Could measurement or ascertainment of the outcome have differed between intervention groups?                                                                                    | PN         |                                     |
|                                          | 4.3 Were outcome assessors aware of the intervention received by study participants?                                                                                                | N          |                                     |
|                                          | 4.4 If Y/PY/Ni to 4.3: Could assessment of the outcome have been influenced by knowledge of intervention received?                                                                  | NA         |                                     |
|                                          | 4.5 If Y/PY/Ni to 4.4: Is it likely that assessment of the outcome was influenced by knowledge of intervention received?                                                            | NA         |                                     |
|                                          | <b>Risk of bias judgement</b>                                                                                                                                                       | <b>Low</b> |                                     |
| Bias in selection of the reported result | 5.1 Were the data that produced this result analysed in accordance with a pre-specified analysis plan that was finalized before unblinded outcome data were available for analysis? | PY         | All pre-specified outcomes reported |
|                                          | 5.2 ... multiple eligible outcome measurements (e.g. scales, definitions, time points) within the outcome domain?                                                                   | PN         |                                     |
|                                          | 5.3 ... multiple eligible analyses of the data?                                                                                                                                     | PN         |                                     |
|                                          | <b>Risk of bias judgement</b>                                                                                                                                                       | <b>Low</b> |                                     |
| Overall bias                             | <b>Risk of bias judgement</b>                                                                                                                                                       | <b>Low</b> |                                     |

|                                                    |                                                                                                                                                                                     |            |                                                              |          |                                            |
|----------------------------------------------------|-------------------------------------------------------------------------------------------------------------------------------------------------------------------------------------|------------|--------------------------------------------------------------|----------|--------------------------------------------|
| Unique ID                                          | Braun Janzen et al. 2019                                                                                                                                                            | Study ID   |                                                              | Assessor |                                            |
| Ref or Label                                       |                                                                                                                                                                                     | Aim        | assignment to intervention (the 'intention-to-treat' effect) |          |                                            |
| Experimental                                       |                                                                                                                                                                                     | Comparator |                                                              | Source   | Journal article(s)                         |
| Outcome                                            |                                                                                                                                                                                     | Results    |                                                              | Weight   | 1                                          |
| Domain                                             | Signalling question                                                                                                                                                                 |            | Response                                                     |          | Comments                                   |
| Bias arising from the randomization process        | 1.1 Was the allocation sequence random?                                                                                                                                             |            | Y                                                            |          | randomization.                             |
|                                                    | 1.2 Was the allocation sequence concealed until participants were enrolled and assigned to interventions?                                                                           |            | NI                                                           |          | No information.                            |
|                                                    | 1.3 Did baseline differences between intervention groups suggest a problem with the randomization process?                                                                          |            | PN                                                           |          |                                            |
|                                                    | <b>Risk of bias judgement</b>                                                                                                                                                       |            | <b>Some concerns</b>                                         |          |                                            |
| Bias due to deviations from intended interventions | 2.1. Were participants aware of their assigned intervention during the trial?                                                                                                       |            | PN                                                           |          |                                            |
|                                                    | 2.2. Were carers and people delivering the interventions aware of participants' assigned intervention during the trial?                                                             |            | N                                                            |          | Evaluators blinded to group designation    |
|                                                    | 2.3. If Y/PY/Ni to 2.1 or 2.2: Were there deviations from the intended intervention that arose because of the experimental context?                                                 |            | NA                                                           |          |                                            |
|                                                    | 2.4 If Y/PY to 2.3: Were these deviations likely to have affected the outcome?                                                                                                      |            | NA                                                           |          |                                            |
|                                                    | 2.5. If Y/PY/Ni to 2.4: Were these deviations from intended intervention balanced between groups?                                                                                   |            | NA                                                           |          |                                            |
|                                                    | 2.6 Was an appropriate analysis used to estimate the effect of assignment to intervention?                                                                                          |            | PY                                                           |          |                                            |
|                                                    | 2.7 If N/PN/Ni to 2.6: Was there potential for a substantial impact (on the result) of the failure to analyse participants in the group to which they were randomized?              |            | NA                                                           |          |                                            |
|                                                    | <b>Risk of bias judgement</b>                                                                                                                                                       |            | <b>Low</b>                                                   |          |                                            |
| Bias due to missing outcome data                   | 3.1 Were data for this outcome available for all, or nearly all, participants randomized?                                                                                           |            | PY                                                           |          | Only 4 participants out of 41 dropped out. |
|                                                    | 3.2 If N/PN/Ni to 3.1: Is there evidence that result was not biased by missing outcome data?                                                                                        |            | NA                                                           |          |                                            |
|                                                    | 3.3 If N/PN to 3.2: Could missingness in the outcome depend on its true value?                                                                                                      |            | NA                                                           |          |                                            |
|                                                    | 3.4 If Y/PY/Ni to 3.3: Is it likely that missingness in the outcome depended on its true value?                                                                                     |            | NA                                                           |          |                                            |
|                                                    | <b>Risk of bias judgement</b>                                                                                                                                                       |            | <b>Low</b>                                                   |          |                                            |
| Bias in measurement of the outcome                 | 4.1 Was the method of measuring the outcome inappropriate?                                                                                                                          |            | PN                                                           |          |                                            |
|                                                    | 4.2 Could measurement or ascertainment of the outcome have differed between intervention groups?                                                                                    |            | PN                                                           |          |                                            |
|                                                    | 4.3 Were outcome assessors aware of the intervention received by study participants?                                                                                                |            | N                                                            |          |                                            |
|                                                    | 4.4 If Y/PY/Ni to 4.3: Could assessment of the outcome have been influenced by knowledge of intervention received?                                                                  |            | NA                                                           |          |                                            |
|                                                    | 4.5 If Y/PY/Ni to 4.4: Is it likely that assessment of the outcome was influenced by knowledge of intervention received?                                                            |            | NA                                                           |          |                                            |
|                                                    | <b>Risk of bias judgement</b>                                                                                                                                                       |            | <b>Low</b>                                                   |          |                                            |
| Bias in selection of the reported result           | 5.1 Were the data that produced this result analysed in accordance with a pre-specified analysis plan that was finalized before unblinded outcome data were available for analysis? |            | PY                                                           |          | All pre-specified outcomes reported.       |
|                                                    | 5.2 ... multiple eligible outcome measurements (e.g. scales, definitions, time points) within the outcome domain?                                                                   |            | PN                                                           |          |                                            |
|                                                    | 5.3 ... multiple eligible analyses of the data?                                                                                                                                     |            | PN                                                           |          |                                            |
|                                                    | <b>Risk of bias judgement</b>                                                                                                                                                       |            | <b>Low</b>                                                   |          |                                            |
| Overall bias                                       | <b>Risk of bias judgement</b>                                                                                                                                                       |            | <b>Some concerns</b>                                         |          |                                            |

| Unique ID                                          | Lee et al. 2018                                                                                                                                                                     | Study ID   |                                                              | Assessor                                                                                       |                    |
|----------------------------------------------------|-------------------------------------------------------------------------------------------------------------------------------------------------------------------------------------|------------|--------------------------------------------------------------|------------------------------------------------------------------------------------------------|--------------------|
| Ref or Label                                       |                                                                                                                                                                                     | Aim        | assignment to intervention (the 'intention-to-treat' effect) |                                                                                                |                    |
| Experimental                                       |                                                                                                                                                                                     | Comparator |                                                              | Source                                                                                         | Journal article(s) |
| Outcome                                            |                                                                                                                                                                                     | Results    |                                                              | Weight                                                                                         | 1                  |
| Domain                                             | Signalling question                                                                                                                                                                 |            | Response                                                     |                                                                                                | Comments           |
| Bias arising from the randomization process        | 1.1 Was the allocation sequence random?                                                                                                                                             |            | Y                                                            | Use of Random Allocation Software                                                              |                    |
|                                                    | 1.2 Was the allocation sequence concealed until participants were enrolled and assigned to interventions?                                                                           |            | PY                                                           |                                                                                                |                    |
|                                                    | 1.3 Did baseline differences between intervention groups suggest a problem with the randomization process?                                                                          |            | PN                                                           |                                                                                                |                    |
|                                                    | Risk of bias judgement                                                                                                                                                              |            | Low                                                          |                                                                                                |                    |
| Bias due to deviations from intended interventions | 2.1.Were participants aware of their assigned intervention during the trial?                                                                                                        |            | PN                                                           | Evaluators blinded to group designation.                                                       |                    |
|                                                    | 2.2.Were carers and people delivering the interventions aware of participants' assigned intervention during the trial?                                                              |            | Y                                                            |                                                                                                |                    |
|                                                    | 2.3. If Y/PY/Nl to 2.1 or 2.2: Were there deviations from the intended intervention that arose because of the experimental context?                                                 |            | PN                                                           |                                                                                                |                    |
|                                                    | 2.4 If Y/PY to 2.3: Were these deviations likely to have affected the outcome?                                                                                                      |            | NA                                                           |                                                                                                |                    |
|                                                    | 2.5. If Y/PY/Nl to 2.4: Were these deviations from intended intervention balanced between groups?                                                                                   |            | NA                                                           |                                                                                                |                    |
|                                                    | 2.6 Was an appropriate analysis used to estimate the effect of assignment to intervention?                                                                                          |            | PY                                                           |                                                                                                |                    |
|                                                    | 2.7 If N/PN/Nl to 2.6: Was there potential for a substantial impact (on the result) of the failure to analyse participants in the group to which they were randomized?              |            | NA                                                           |                                                                                                |                    |
|                                                    | Risk of bias judgement                                                                                                                                                              |            | Low                                                          |                                                                                                |                    |
| Bias due to missing outcome data                   | 3.1 Were data for this outcome available for all, or nearly all, participants randomized?                                                                                           |            | Y                                                            | Only 1 participants out of 45 dropped out. All pre-specified outcomes reported.                |                    |
|                                                    | 3.2 If N/PN/Nl to 3.1: Is there evidence that result was not biased by missing outcome data?                                                                                        |            | NA                                                           |                                                                                                |                    |
|                                                    | 3.3 If N/PN to 3.2: Could missingness in the outcome depend on its true value?                                                                                                      |            | NA                                                           |                                                                                                |                    |
|                                                    | 3.4 If Y/PY/Nl to 3.3: Is it likely that missingness in the outcome depended on its true value?                                                                                     |            | NA                                                           |                                                                                                |                    |
|                                                    | Risk of bias judgement                                                                                                                                                              |            | Low                                                          |                                                                                                |                    |
| Bias in measurement of the outcome                 | 4.1 Was the method of measuring the outcome inappropriate?                                                                                                                          |            | PN                                                           |                                                                                                |                    |
|                                                    | 4.2 Could measurement or ascertainment of the outcome have differed between intervention groups?                                                                                    |            | PN                                                           |                                                                                                |                    |
|                                                    | 4.3 Were outcome assessors aware of the intervention received by study participants?                                                                                                |            | N                                                            |                                                                                                |                    |
|                                                    | 4.4 If Y/PY/Nl to 4.3: Could assessment of the outcome have been influenced by knowledge of intervention received?                                                                  |            | NA                                                           |                                                                                                |                    |
|                                                    | 4.5 If Y/PY/Nl to 4.4: Is it likely that assessment of the outcome was influenced by knowledge of intervention received?                                                            |            | NA                                                           |                                                                                                |                    |
|                                                    | Risk of bias judgement                                                                                                                                                              |            | Low                                                          |                                                                                                |                    |
| Bias in selection of the reported result           | 5.1 Were the data that produced this result analysed in accordance with a pre-specified analysis plan that was finalized before unblinded outcome data were available for analysis? |            | PY                                                           | Use of Random Allocation Software<br>No information<br>Evaluators blinded to group designation |                    |
|                                                    | 5.2 ... multiple eligible outcome measurements (e.g. scales, definitions, time points) within the outcome domain?                                                                   |            | PN                                                           |                                                                                                |                    |
|                                                    | 5.3 ... multiple eligible analyses of the data?                                                                                                                                     |            | PN                                                           |                                                                                                |                    |
|                                                    | Risk of bias judgement                                                                                                                                                              |            | Low                                                          |                                                                                                |                    |
| Overall bias                                       | Risk of bias judgement                                                                                                                                                              |            | Low                                                          |                                                                                                |                    |

| Unique ID                                          | Thaut et al. 2019                                                                                                                                                      | Study ID   |                                                              | Assessor                                                                                                                                                                          |                    |
|----------------------------------------------------|------------------------------------------------------------------------------------------------------------------------------------------------------------------------|------------|--------------------------------------------------------------|-----------------------------------------------------------------------------------------------------------------------------------------------------------------------------------|--------------------|
| Ref or Label                                       |                                                                                                                                                                        | Aim        | assignment to intervention (the 'intention-to-treat' effect) |                                                                                                                                                                                   |                    |
| Experimental                                       |                                                                                                                                                                        | Comparator |                                                              | Source                                                                                                                                                                            | Journal article(s) |
| Outcome                                            |                                                                                                                                                                        | Results    |                                                              | Weight                                                                                                                                                                            | 1                  |
| Domain                                             | Signalling question                                                                                                                                                    |            | Response                                                     |                                                                                                                                                                                   | Comments           |
| Bias arising from the randomization process        | 1.1 Was the allocation sequence random?                                                                                                                                |            | Y                                                            | Use a computerized random selector program implemented by a computer specialist external to the study to assure allocation concealment<br>Use a unique, computer-generated random |                    |
|                                                    | 1.2 Was the allocation sequence concealed until participants were enrolled and assigned to interventions?                                                              |            | Y                                                            |                                                                                                                                                                                   |                    |
|                                                    | 1.3 Did baseline differences between intervention groups suggest a problem with the randomization process?                                                             |            | N                                                            |                                                                                                                                                                                   |                    |
|                                                    | Risk of bias judgement                                                                                                                                                 |            | Low                                                          |                                                                                                                                                                                   |                    |
| Bias due to deviations from intended interventions | 2.1.Were participants aware of their assigned intervention during the trial?                                                                                           |            | PN                                                           | Evaluators blinded to group designation.                                                                                                                                          |                    |
|                                                    | 2.2.Were carers and people delivering the interventions aware of participants' assigned intervention during the trial?                                                 |            | N                                                            |                                                                                                                                                                                   |                    |
|                                                    | 2.3. If Y/PY/Nl to 2.1 or 2.2: Were there deviations from the intended intervention that arose because of the experimental context?                                    |            | NA                                                           |                                                                                                                                                                                   |                    |
|                                                    | 2.4 If Y/PY to 2.3: Were these deviations likely to have affected the outcome?                                                                                         |            | NA                                                           |                                                                                                                                                                                   |                    |
|                                                    | 2.5. If Y/PY/Nl to 2.4: Were these deviations from intended intervention balanced between groups?                                                                      |            | NA                                                           |                                                                                                                                                                                   |                    |
|                                                    | 2.6 Was an appropriate analysis used to estimate the effect of assignment to intervention?                                                                             |            | PY                                                           |                                                                                                                                                                                   |                    |
|                                                    | 2.7 If N/PN/Nl to 2.6: Was there potential for a substantial impact (on the result) of the failure to analyse participants in the group to which they were randomized? |            | NA                                                           |                                                                                                                                                                                   |                    |

|                                                 |                                                                                                                                                                                     |                      |                                                                                                                                     |
|-------------------------------------------------|-------------------------------------------------------------------------------------------------------------------------------------------------------------------------------------|----------------------|-------------------------------------------------------------------------------------------------------------------------------------|
|                                                 | <b>Risk of bias judgement</b>                                                                                                                                                       | <b>Low</b>           |                                                                                                                                     |
| <b>Bias due to missing outcome data</b>         | 3.1 Were data for this outcome available for all, or nearly all, participants randomized?                                                                                           | N                    | Missing outcome data balanced in numbers across intervention and control group, with similar reasons for missing data across        |
|                                                 | 3.2 If N/PN/Ni to 3.1: Is there evidence that result was not biased by missing outcome data?                                                                                        | N                    |                                                                                                                                     |
|                                                 | 3.3 If N/PN to 3.2: Could missingness in the outcome depend on its true value?                                                                                                      | PN                   | Missing outcome data balanced in numbers across intervention and control group, with similar reasons for missing data across groups |
|                                                 | 3.4 If Y/PY/Ni to 3.3: Is it likely that missingness in the outcome depended on its true value?                                                                                     | NA                   |                                                                                                                                     |
|                                                 | <b>Risk of bias judgement</b>                                                                                                                                                       | <b>Some concerns</b> |                                                                                                                                     |
| <b>Bias in measurement of the outcome</b>       | 4.1 Was the method of measuring the outcome inappropriate?                                                                                                                          | N                    |                                                                                                                                     |
|                                                 | 4.2 Could measurement or ascertainment of the outcome have differed between intervention groups?                                                                                    | PN                   |                                                                                                                                     |
|                                                 | 4.3 Were outcome assessors aware of the intervention received by study participants?                                                                                                | N                    |                                                                                                                                     |
|                                                 | 4.4 If Y/PY/Ni to 4.3: Could assessment of the outcome have been influenced by knowledge of intervention received?                                                                  | NA                   |                                                                                                                                     |
|                                                 | 4.5 If Y/PY/Ni to 4.4: Is it likely that assessment of the outcome was influenced by knowledge of intervention received?                                                            | NA                   |                                                                                                                                     |
|                                                 | <b>Risk of bias judgement</b>                                                                                                                                                       | <b>Low</b>           |                                                                                                                                     |
| <b>Bias in selection of the reported result</b> | 5.1 Were the data that produced this result analysed in accordance with a pre-specified analysis plan that was finalized before unblinded outcome data were available for analysis? | Y                    | Use a computerized random selector program implemented by a computer specialist external to the study to ensure                     |
|                                                 | 5.2 ... multiple eligible outcome measurements (e.g. scales, definitions, time points) within the outcome domain?                                                                   | PN                   |                                                                                                                                     |
|                                                 | 5.3 ... multiple eligible analyses of the data?                                                                                                                                     | PN                   |                                                                                                                                     |
|                                                 | <b>Risk of bias judgement</b>                                                                                                                                                       | <b>Low</b>           |                                                                                                                                     |
| <b>Overall bias</b>                             | <b>Risk of bias judgement</b>                                                                                                                                                       | <b>Some concerns</b> |                                                                                                                                     |

|                                                           |                                                                                                                                                                                     |                   |                                                              |                 |                                                                                             |
|-----------------------------------------------------------|-------------------------------------------------------------------------------------------------------------------------------------------------------------------------------------|-------------------|--------------------------------------------------------------|-----------------|---------------------------------------------------------------------------------------------|
| <b>Unique ID</b>                                          | Murgia et al. 2018                                                                                                                                                                  | <b>Study ID</b>   |                                                              | <b>Assessor</b> |                                                                                             |
| <b>Ref or Label</b>                                       |                                                                                                                                                                                     | <b>Aim</b>        | assignment to intervention (the 'intention-to-treat' effect) |                 |                                                                                             |
| <b>Experimental</b>                                       |                                                                                                                                                                                     | <b>Comparator</b> |                                                              | <b>Source</b>   | Journal article(s)                                                                          |
| <b>Outcome</b>                                            |                                                                                                                                                                                     | <b>Results</b>    |                                                              | <b>Weight</b>   | 1                                                                                           |
| <b>Domain</b>                                             | <b>Signalling question</b>                                                                                                                                                          |                   | <b>Response</b>                                              |                 | <b>Comments</b>                                                                             |
| <b>Bias arising from the randomization process</b>        | 1.1 Was the allocation sequence random?                                                                                                                                             |                   | Y                                                            |                 | Use of block randomisation generated by an online sequence generator (described in detail). |
|                                                           | 1.2 Was the allocation sequence concealed until participants were enrolled and assigned to interventions?                                                                           |                   | PY                                                           |                 | Described in sufficient detail to allow a                                                   |
|                                                           | 1.3 Did baseline differences between intervention groups suggest a problem with the randomization process?                                                                          |                   | PN                                                           |                 |                                                                                             |
|                                                           | <b>Risk of bias judgement</b>                                                                                                                                                       |                   | <b>Low</b>                                                   |                 |                                                                                             |
| <b>Bias due to deviations from intended interventions</b> | 2.1. Were participants aware of their assigned intervention during the trial?                                                                                                       |                   | Y                                                            |                 | Observer-blind trial.                                                                       |
|                                                           | 2.2. Were carers and people delivering the interventions aware of participants' assigned intervention during the trial?                                                             |                   | PY                                                           |                 |                                                                                             |
|                                                           | 2.3. If Y/PY/Ni to 2.1 or 2.2: Were there deviations from the intended intervention that arose because of the experimental context?                                                 |                   | PN                                                           |                 |                                                                                             |
|                                                           | 2.4 If Y/PY to 2.3: Were these deviations likely to have affected the outcome?                                                                                                      |                   | NA                                                           |                 |                                                                                             |
|                                                           | 2.5. If Y/PY/Ni to 2.4: Were these deviations from intended intervention balanced between groups?                                                                                   |                   | NA                                                           |                 |                                                                                             |
|                                                           | 2.6 Was an appropriate analysis used to estimate the effect of assignment to intervention?                                                                                          |                   | PY                                                           |                 |                                                                                             |
|                                                           | 2.7 If N/PN/Ni to 2.6: Was there potential for a substantial impact (on the result) of the failure to analyse participants in the group to which they were randomized?              |                   | NA                                                           |                 |                                                                                             |
|                                                           | <b>Risk of bias judgement</b>                                                                                                                                                       |                   | <b>Low</b>                                                   |                 |                                                                                             |
| <b>Bias due to missing outcome data</b>                   | 3.1 Were data for this outcome available for all, or nearly all, participants randomized?                                                                                           |                   | N                                                            |                 | Use of block randomisation generated by an online sequence generator (described in detail). |
|                                                           | 3.2 If N/PN/Ni to 3.1: Is there evidence that result was not biased by missing outcome data?                                                                                        |                   | PN                                                           |                 |                                                                                             |
|                                                           | 3.3 If N/PN to 3.2: Could missingness in the outcome depend on its true value?                                                                                                      |                   | PN                                                           |                 |                                                                                             |
|                                                           | 3.4 If Y/PY/Ni to 3.3: Is it likely that missingness in the outcome depended on its true value?                                                                                     |                   | NA                                                           |                 |                                                                                             |
|                                                           | <b>Risk of bias judgement</b>                                                                                                                                                       |                   | <b>Some concerns</b>                                         |                 |                                                                                             |
| <b>Bias in measurement of the outcome</b>                 | 4.1 Was the method of measuring the outcome inappropriate?                                                                                                                          |                   | N                                                            |                 |                                                                                             |
|                                                           | 4.2 Could measurement or ascertainment of the outcome have differed between intervention groups?                                                                                    |                   | PN                                                           |                 |                                                                                             |
|                                                           | 4.3 Were outcome assessors aware of the intervention received by study participants?                                                                                                |                   | N                                                            |                 |                                                                                             |
|                                                           | 4.4 If Y/PY/Ni to 4.3: Could assessment of the outcome have been influenced by knowledge of intervention received?                                                                  |                   | NA                                                           |                 |                                                                                             |
|                                                           | 4.5 If Y/PY/Ni to 4.4: Is it likely that assessment of the outcome was influenced by knowledge of intervention received?                                                            |                   | NA                                                           |                 |                                                                                             |
|                                                           | <b>Risk of bias judgement</b>                                                                                                                                                       |                   | <b>Low</b>                                                   |                 |                                                                                             |
| <b>Bias in selection of the reported result</b>           | 5.1 Were the data that produced this result analysed in accordance with a pre-specified analysis plan that was finalized before unblinded outcome data were available for analysis? |                   | PY                                                           |                 | All pre-specified outcomes reported.                                                        |
|                                                           | 5.2 ... multiple eligible outcome measurements (e.g. scales, definitions, time points) within the outcome domain?                                                                   |                   | PN                                                           |                 |                                                                                             |
|                                                           | 5.3 ... multiple eligible analyses of the data?                                                                                                                                     |                   | PN                                                           |                 |                                                                                             |
|                                                           | <b>Risk of bias judgement</b>                                                                                                                                                       |                   | <b>Low</b>                                                   |                 |                                                                                             |
| <b>Overall bias</b>                                       | <b>Risk of bias judgement</b>                                                                                                                                                       |                   | <b>Some concerns</b>                                         |                 |                                                                                             |

| Unique ID                                          | Mainka et al. 2018                                                                                                                                                                  | Study ID   |                                                              | Assessor |                                                                                                                                    |
|----------------------------------------------------|-------------------------------------------------------------------------------------------------------------------------------------------------------------------------------------|------------|--------------------------------------------------------------|----------|------------------------------------------------------------------------------------------------------------------------------------|
| Ref or Label                                       |                                                                                                                                                                                     | Aim        | assignment to intervention (the 'intention-to-treat' effect) |          |                                                                                                                                    |
| Experimental                                       |                                                                                                                                                                                     | Comparator |                                                              | Source   | Journal article(s)                                                                                                                 |
| Outcome                                            |                                                                                                                                                                                     | Results    |                                                              | Weight   | 1                                                                                                                                  |
| Domain                                             | Signalling question                                                                                                                                                                 |            | Response                                                     |          | Comments                                                                                                                           |
| Bias arising from the randomization process        | 1.1 Was the allocation sequence random?                                                                                                                                             |            | Y                                                            |          | Use of block randomization (software randomist) by a person not involved in the study.<br>Sealed, sequentially numbered envelopes. |
|                                                    | 1.2 Was the allocation sequence concealed until participants were enrolled and assigned to interventions?                                                                           |            | Y                                                            |          |                                                                                                                                    |
|                                                    | 1.3 Did baseline differences between intervention groups suggest a problem with the randomization process?                                                                          |            | PN                                                           |          |                                                                                                                                    |
|                                                    | Risk of bias judgement                                                                                                                                                              |            | Low                                                          |          |                                                                                                                                    |
| Bias due to deviations from intended interventions | 2.1. Were participants aware of their assigned intervention during the trial?                                                                                                       |            | PN                                                           |          | Evaluators blinded to group designation.                                                                                           |
|                                                    | 2.2. Were carers and people delivering the interventions aware of participants' assigned intervention during the trial?                                                             |            | PN                                                           |          |                                                                                                                                    |
|                                                    | 2.3. If Y/PY/Ni to 2.1 or 2.2: Were there deviations from the intended intervention that arose because of the experimental context?                                                 |            | NA                                                           |          |                                                                                                                                    |
|                                                    | 2.4 If Y/PY to 2.3: Were these deviations likely to have affected the outcome?                                                                                                      |            | NA                                                           |          |                                                                                                                                    |
|                                                    | 2.5. If Y/PY/Ni to 2.4: Were these deviations from intended intervention balanced between groups?                                                                                   |            | NA                                                           |          |                                                                                                                                    |
|                                                    | 2.6 Was an appropriate analysis used to estimate the effect of assignment to intervention?                                                                                          |            | PY                                                           |          |                                                                                                                                    |
|                                                    | 2.7 If N/PN/Ni to 2.6: Was there potential for a substantial impact (on the result) of the failure to analyse participants in the group to which they were randomized?              |            | NA                                                           |          |                                                                                                                                    |
|                                                    | Risk of bias judgement                                                                                                                                                              |            | Low                                                          |          |                                                                                                                                    |
| Bias due to missing outcome data                   | 3.1 Were data for this outcome available for all, or nearly all, participants randomized?                                                                                           |            | N                                                            |          | Of the 45 participants, 10 dropped out and the reasons were described. Three groups of almost equal numbers took part in the       |
|                                                    | 3.2 If N/PN/Ni to 3.1: Is there evidence that result was not biased by missing outcome data?                                                                                        |            | N                                                            |          |                                                                                                                                    |
|                                                    | 3.3 If N/PN to 3.2: Could missingness in the outcome depend on its true value?                                                                                                      |            | PN                                                           |          |                                                                                                                                    |
|                                                    | 3.4 If Y/PY/Ni to 3.3: Is it likely that missingness in the outcome depended on its true value?                                                                                     |            | NA                                                           |          |                                                                                                                                    |
|                                                    | Risk of bias judgement                                                                                                                                                              |            | Some concerns                                                |          |                                                                                                                                    |
| Bias in measurement of the outcome                 | 4.1 Was the method of measuring the outcome inappropriate?                                                                                                                          |            | N                                                            |          |                                                                                                                                    |
|                                                    | 4.2 Could measurement or ascertainment of the outcome have differed between intervention groups?                                                                                    |            | PN                                                           |          |                                                                                                                                    |
|                                                    | 4.3 Were outcome assessors aware of the intervention received by study participants?                                                                                                |            | N                                                            |          |                                                                                                                                    |
|                                                    | 4.4 If Y/PY/Ni to 4.3: Could assessment of the outcome have been influenced by knowledge of intervention received?                                                                  |            | NA                                                           |          |                                                                                                                                    |
|                                                    | 4.5 If Y/PY/Ni to 4.4: Is it likely that assessment of the outcome was influenced by knowledge of intervention received?                                                            |            | NA                                                           |          |                                                                                                                                    |
|                                                    | Risk of bias judgement                                                                                                                                                              |            | Low                                                          |          |                                                                                                                                    |
| Bias in selection of the reported result           | 5.1 Were the data that produced this result analysed in accordance with a pre-specified analysis plan that was finalized before unblinded outcome data were available for analysis? |            | Y                                                            |          | The study protocol is available; all pre-specified outcomes reported.                                                              |
|                                                    | 5.2 ... multiple eligible outcome measurements (e.g. scales, definitions, time points) within the outcome domain?                                                                   |            | PN                                                           |          |                                                                                                                                    |
|                                                    | 5.3 ... multiple eligible analyses of the data?                                                                                                                                     |            | PN                                                           |          |                                                                                                                                    |
|                                                    | Risk of bias judgement                                                                                                                                                              |            | Low                                                          |          |                                                                                                                                    |
| Overall bias                                       | Risk of bias judgement                                                                                                                                                              |            | Some concerns                                                |          |                                                                                                                                    |

| Unique ID                                          | Bella et al. 2017                                                                                                                   | Study ID   |                                                              | Assessor |                    |
|----------------------------------------------------|-------------------------------------------------------------------------------------------------------------------------------------|------------|--------------------------------------------------------------|----------|--------------------|
| Ref or Label                                       |                                                                                                                                     | Aim        | assignment to intervention (the 'intention-to-treat' effect) |          |                    |
| Experimental                                       |                                                                                                                                     | Comparator |                                                              | Source   | Journal article(s) |
| Outcome                                            |                                                                                                                                     | Results    |                                                              | Weight   | 1                  |
| Domain                                             | Signalling question                                                                                                                 |            | Response                                                     |          | Comments           |
| Bias arising from the randomization process        | 1.1 Was the allocation sequence random?                                                                                             |            | NI                                                           |          | No information.    |
|                                                    | 1.2 Was the allocation sequence concealed until participants were enrolled and assigned to interventions?                           |            | NI                                                           |          |                    |
|                                                    | 1.3 Did baseline differences between intervention groups suggest a problem with the randomization process?                          |            | PN                                                           |          |                    |
|                                                    | Risk of bias judgement                                                                                                              |            | Some concerns                                                |          |                    |
| Bias due to deviations from intended interventions | 2.1. Were participants aware of their assigned intervention during the trial?                                                       |            | NI                                                           |          | No information.    |
|                                                    | 2.2. Were carers and people delivering the interventions aware of participants' assigned intervention during the trial?             |            | NI                                                           |          |                    |
|                                                    | 2.3. If Y/PY/Ni to 2.1 or 2.2: Were there deviations from the intended intervention that arose because of the experimental context? |            | PN                                                           |          |                    |
|                                                    | 2.4 If Y/PY to 2.3: Were these deviations likely to have affected the outcome?                                                      |            | NA                                                           |          |                    |
|                                                    | 2.5. If Y/PY/Ni to 2.4: Were these deviations from intended intervention balanced between groups?                                   |            | NA                                                           |          |                    |
|                                                    | 2.6 Was an appropriate analysis used to estimate the effect of assignment to intervention?                                          |            | NI                                                           |          |                    |

|                                                 |                                                                                                                                                                                     |                      |                                                                                                                           |
|-------------------------------------------------|-------------------------------------------------------------------------------------------------------------------------------------------------------------------------------------|----------------------|---------------------------------------------------------------------------------------------------------------------------|
|                                                 | 2.7 If N/PN/Ni to 2.6: Was there potential for a substantial impact (on the result) of the failure to analyse participants in the group to which they were randomized?              | NI                   |                                                                                                                           |
|                                                 | <b>Risk of bias judgement</b>                                                                                                                                                       | <b>High</b>          |                                                                                                                           |
| <b>Bias due to missing outcome data</b>         | 3.1 Were data for this outcome available for all, or nearly all, participants randomized?                                                                                           | N                    | Of the 21 person intervention group, 7 subjects dropped out (reasons described). Controls' performance was assessed only. |
|                                                 | 3.2 If N/PN/Ni to 3.1: Is there evidence that result was not biased by missing outcome data?                                                                                        | N                    |                                                                                                                           |
|                                                 | 3.3 If N/PN to 3.2: Could missingness in the outcome depend on its true value?                                                                                                      | PN                   |                                                                                                                           |
|                                                 | 3.4 If Y/PY/Ni to 3.3: Is it likely that missingness in the outcome depended on its true value?                                                                                     | NA                   |                                                                                                                           |
|                                                 | <b>Risk of bias judgement</b>                                                                                                                                                       | <b>Some concerns</b> |                                                                                                                           |
| <b>Bias in measurement of the outcome</b>       | 4.1 Was the method of measuring the outcome inappropriate?                                                                                                                          | PN                   |                                                                                                                           |
|                                                 | 4.2 Could measurement or ascertainment of the outcome have differed between intervention groups?                                                                                    | PN                   |                                                                                                                           |
|                                                 | 4.3 Were outcome assessors aware of the intervention received by study participants?                                                                                                | PN                   |                                                                                                                           |
|                                                 | 4.4 If Y/PY/Ni to 4.3: Could assessment of the outcome have been influenced by knowledge of intervention received?                                                                  | NA                   |                                                                                                                           |
|                                                 | 4.5 If Y/PY/Ni to 4.4: Is it likely that assessment of the outcome was influenced by knowledge of intervention received?                                                            | NA                   |                                                                                                                           |
|                                                 | <b>Risk of bias judgement</b>                                                                                                                                                       | <b>Low</b>           |                                                                                                                           |
| <b>Bias in selection of the reported result</b> | 5.1 Were the data that produced this result analysed in accordance with a pre-specified analysis plan that was finalized before unblinded outcome data were available for analysis? | py                   | All pre-specified outcomes reported.                                                                                      |
|                                                 | 5.2 ... multiple eligible outcome measurements (e.g. scales, definitions, time points) within the outcome domain?                                                                   | PN                   |                                                                                                                           |
|                                                 | 5.3 ... multiple eligible analyses of the data?                                                                                                                                     | PN                   |                                                                                                                           |
|                                                 | <b>Risk of bias judgement</b>                                                                                                                                                       | <b>Low</b>           |                                                                                                                           |
| <b>Overall bias</b>                             | <b>Risk of bias judgement</b>                                                                                                                                                       | <b>High</b>          |                                                                                                                           |
