# Supplementary material for: Neurologic Music Therapy in Geriatric Rehabilitation: A Systematic Review
Source: MDPI journal article supplement (doi:10.3390/healthcare10112187), 2022-10-31
Supplement: s1 [file s1]

**Characteristics of studies qualifying for review (N = 8).**

| No. | Author (year)              | Participants                   | Number of participants | NMT technique                                | Duration of intervention | Assessment                                                                                                        | Main results                                                                                                                                                                                                                             | Study design                              |
|-----|----------------------------|--------------------------------|------------------------|----------------------------------------------|--------------------------|-------------------------------------------------------------------------------------------------------------------|------------------------------------------------------------------------------------------------------------------------------------------------------------------------------------------------------------------------------------------|-------------------------------------------|
| 1.  | Capato et al. (2020)       | Parkinson's disease            | 35                     | Multimodal balance training supported by RAS | 5 weeks                  | H&Y; MMSE; MBEST; BBS; TUG; TUG-dual task condition; Rapid Turns Test; N-FOGQ; MDS-UPDRS part 2 and part 3; FES-I | Physiotherapy with a specific protocol of exercises with RAS can improve balance performance in PD patients in advanced disease stages and mild cognitive decline.                                                                       | RCT                                       |
| 2.  | Calabrò et al. (2019)      | idiopathic Parkinson's disease | 50                     | RAS                                          | 8 weeks                  | Functional Gait Assessment; Tinetti Falls Efficacy Scale; UPDRS; EEG                                              | RAS may be a useful add-on gait rehabilitation strategy in PD, as auditory cueing can specifically target motor cortical beta frequency range synchrony during steady-state treadmill walking in patients with PD.                       | RCT<br>registration trial:<br>NCT03434496 |
| 3.  | Braun Janzen et al. (2019) | idiopathic Parkinson's disease | 37                     | RAS                                          | 1 hour                   | H&Y; MDS-UPDRS; Likert Scale; BBS; 9-HPT                                                                          | This research study supports the hypothesis that rhythmic priming is possible across effector systems by demonstrating that RAS training of finger movements had immediate effects on the gait velocity and cadence of patients with PD. | RCT<br>Reference number: 10-1752H         |

|    |                      |                     |    |     |          |                                                                                                                                                             |                                                                                                                                                                                                                                          |                                               |
|----|----------------------|---------------------|----|-----|----------|-------------------------------------------------------------------------------------------------------------------------------------------------------------|------------------------------------------------------------------------------------------------------------------------------------------------------------------------------------------------------------------------------------------|-----------------------------------------------|
| 4. | Lee et al. (2018)    | Stroke patients     | 44 | RAS | 6 weeks  | Gait analysis system OptoGait; Logitech Webcam Pro 9000; TUG; BBS; FMA                                                                                      | Compared to standard gait training, a 6-week programme including gait training with bilateral RAS proved to be more effective with regard to the symmetry of gait, gait ability, balance and function of lower limbs in stroke patients. | RCT<br><br>registration trial: SYUIRB2012-059 |
| 5. | Thaut et al. (2019)  | Parkinson's disease | 60 | RAS | 24 weeks | H&Y; MMSE; BBS; TUG; FES; Fall Index; a computerized stride analyser system (B&L Engineering) with a 4-camera (3D) VICON-MOTUS video motion analysis system | RAS training significantly reduced the number of falls in Parkinson's disease patients and modified key gait parameters, such as velocity and stride length.                                                                             | RCT<br><br>registration trial: NCT03316365    |
| 6. | Murgia et al. (2018) | Parkinson's disease | 32 | RAS | 5 weeks  | MMSE; FAB; a motion capture Smart-D system; Smart Analyzer; Modified H&Y; UPDRS; FIM; Tinetti test; SPPB; GDS; PDQ-8; FES; ABC; FOGQ                        | The results suggest that ecological RAS is equally effective compared to artificial RAS. Future studies should further investigate the role of ecological RAS, on the basis of information revealed by our exploratory                   | RCT<br><br>registration trial: NCT03228888    |

|    |                      |                 |    |     |         |                     |                                                                                                                                                                                                                                                                                                                                                                                    |                                                |
|----|----------------------|-----------------|----|-----|---------|---------------------|------------------------------------------------------------------------------------------------------------------------------------------------------------------------------------------------------------------------------------------------------------------------------------------------------------------------------------------------------------------------------------|------------------------------------------------|
|    |                      |                 |    |     |         |                     | analyses.                                                                                                                                                                                                                                                                                                                                                                          |                                                |
| 7. | Mainka et al. (2018) | Stroke patients | 35 | RAS | 4 weeks | FGS; LOC; 3MWT; IEB | The study provides the first evidence for a higher efficacy of RAS-treadmill training in comparison to the standard approaches (i.e., treadmill training and neurodevelopmental treatment) in restoring functional gait in SPs. The results support the implementation of functional music in neurological gait rehabilitation and its use in combination with treadmill training. | RCT<br><br>registration trial:<br>DRKS00014603 |

|    |                     |                                |    |     |         |                                                                                                                           |                                                                                                                                                                                                                                                                                      |                                                           |
|----|---------------------|--------------------------------|----|-----|---------|---------------------------------------------------------------------------------------------------------------------------|--------------------------------------------------------------------------------------------------------------------------------------------------------------------------------------------------------------------------------------------------------------------------------------|-----------------------------------------------------------|
| 8. | Bella et al. (2017) | idiopathic Parkinson's disease | 34 | RAS | 4 weeks | UPDRS; H&Y; ADL; CONSORT Statement; PEDro scale; Vicon MX Motion Capture System; BAASTA; Roland SPD-6 MIDI percussion pad | RAS-based training programme, customized according to the patient's preferred cadence, has improved follicular-temporal gait parameters, such as speed and step length, under uncued walking conditions. This effect was maintained 1 month after the end of the training programme. | FP7 Initial Training Network - grant agreement no. 238157 |
|----|---------------------|--------------------------------|----|-----|---------|---------------------------------------------------------------------------------------------------------------------------|--------------------------------------------------------------------------------------------------------------------------------------------------------------------------------------------------------------------------------------------------------------------------------------|-----------------------------------------------------------|

Abbreviations: **RAS** - Rhythmic Auditory Stimulation; **H&Y** - Hoehn and Yahr Scale; **MBEST** - Mini-BESTest; **N-FOGQ** - New Freezing of Gait Questionnaire; **MDS-UPDRS** - Movement Disorder Society-Unified Parkinson's Disease Rating Scale; **UPDRS** - Unified Parkinson's Disease Rating Scale; **BBS** - Berg Balance Scale; **9-HPT** - Nine-Hole Peg Test; **TUG** - Timed Up and Go test; **FMA** – Fugl-Meyer Assessment; **MMSE** - Mini Mental Status Examination; **FES-I** - Falls Efficacy Scale-International; **FES** - Falls Efficacy Scale; **FAB** - Frontal Assessment Battery; **FIM** - Functional Independence Measure; **SPPB** - Short Physical Performance Battery; **GDS** - Geriatric Depression Scale; **PDQ-8** - Parkinson's Disease Quality of Life Questionnaire; **ABC** - Activities specific balance confidence; **FOGQ** - Freezing of Gait Questionnaire; **FGS** - Fast Gait Speed Test; **LOC** - a gait analysis with the locometre; **3MWT** - Three-Minute Walk Test; **IEB** - Instrumental Evaluation of Balance; **ADL** - Schwab and England Activities of Daily Living; **BAASTA** - Battery for the Assessment of Auditory Sensorimotor and Timing Abilities; **6MWT** - Six-Minute Walk Test.
