# Supplementary material for: Neurologic Music Therapy in Geriatric Rehabilitation: A Systematic Review
Source: Healthcare (Basel). 2022 Oct 31;10(11):2187. doi: 10.3390/healthcare10112187 (PMC9690210; doi:10.3390/healthcare10112187)
Supplement: Supplementary file 1 [file healthcare-10-02187-s001.zip]

Archive with 4 entries (4 files):
- File S3_Characteristics of studies qualifying for review.pdf
- File S4_Exluded Fulltext.pdf
- [File S1_PICO].pdf
- [File S2_Risk of Bias].pdf
